# Supplementary material for: Abnormal Micronutrient Intake Is Associated with the Risk of Periodontitis: A Dose–response Association Study Based on NHANES 2009–2014
Source: MDPI journal article supplement (doi:10.3390/nu14122466), 2022-06-14
Supplement: s1 [file s1]

**Table S4. Characteristic of continuous variables of model 3**

|                     | Overall <sup>a</sup> | Moderate/Severe periodontitis | No/Mild periodontitis | <i>P</i> |
|---------------------|----------------------|-------------------------------|-----------------------|----------|
| No.                 | 5530                 | 2765                          | 2765                  |          |
| Vitamin_A (/1mg)    | 0.53 [0.34, 0.80]    | 0.55 [0.35, 0.83]             | 0.51 [0.32, 0.77]     | <0.001   |
| Vitamin_B1 (/1mg)   | 1.51 [1.13, 2.05]    | 1.52 [1.15, 2.06]             | 1.50 [1.10, 2.03]     | 0.047    |
| Vitamin_B2 (/1mg)   | 1.92 [1.39, 2.60]    | 2.00 [1.43, 2.69]             | 1.85 [1.36, 2.51]     | <0.001   |
| Vitamin_B3 (/10mg)  | 2.32 [1.73, 3.10]    | 2.33 [1.76, 3.10]             | 2.32 [1.70, 3.08]     | 0.506    |
| Vitamin_B6 (/1mg)   | 1.93 [1.40, 2.63]    | 1.95 [1.42, 2.64]             | 1.92 [1.39, 2.62]     | 0.239    |
| Vitamin_B9 (/100µg) | 3.64 [2.64, 5.00]    | 3.69 [2.67, 5.04]             | 3.60 [2.61, 4.94]     | 0.199    |
| Vitamin_B12 (/10µg) | 0.45 [0.29, 0.69]    | 0.46 [0.29, 0.72]             | 0.44 [0.28, 0.67]     | 0.016    |
| Vitamin_C (/100mg)  | 0.70 [0.35, 1.22]    | 0.69 [0.35, 1.20]             | 0.71 [0.34, 1.25]     | 0.379    |
| Vitamin_D (/10µg)   | 0.41 [0.23, 0.67]    | 0.41 [0.23, 0.69]             | 0.40 [0.22, 0.66]     | 0.123    |
| Vitamin_E (/1mg)    | 7.01 [4.84, 9.98]    | 7.27 [5.12, 10.21]            | 6.77 [4.63, 9.71]     | <0.001   |
| Vitamin_K (/100µg)  | 0.76 [0.46, 1.31]    | 0.78 [0.47, 1.34]             | 0.74 [0.44, 1.28]     | 0.014    |
| Calcium (/1g)       | 8.35 [5.96, 11.75]   | 8.61 [6.15, 11.95]            | 8.14 [5.81, 11.52]    | 0.001    |
| Copper (/1mg)       | 1.14 [0.88, 1.53]    | 1.16 [0.89, 1.54]             | 1.12 [0.86, 1.52]     | 0.035    |
| Iron (/10mg)        | 1.36 [1.01, 1.83]    | 1.38 [1.02, 1.86]             | 1.35 [0.99, 1.82]     | 0.086    |
| Magnesium (/100mg)  | 2.80 [2.14, 3.66]    | 2.84 [2.19, 3.70]             | 2.77 [2.10, 3.62]     | 0.018    |
| Phosphorus (/1g)    | 1.26 [0.97, 1.64]    | 1.28 [0.99, 1.66]             | 1.24 [0.96, 1.62]     | 0.018    |
| Potassium (/1g)     | 2.55 [1.96, 3.27]    | 2.56 [2.01, 3.29]             | 2.54 [1.92, 3.25]     | 0.141    |
| Selenium (/100µg)   | 1.05 [0.77, 1.38]    | 1.05 [0.78, 1.37]             | 1.05 [0.77, 1.40]     | 0.79     |
| Sodium (/1g)        | 3.17 [2.38, 4.14]    | 3.20 [2.39, 4.16]             | 3.15 [2.37, 4.12]     | 0.292    |
| Zinc (/10mg)        | 1.02 [0.75, 1.39]    | 1.03 [0.76, 1.41]             | 1.02 [0.75, 1.37]     | 0.038    |

a: Median [quartile] of nutrient intake; b: Rank sum test was used for all classified variables.
