# Supplementary material for: Abnormal Micronutrient Intake Is Associated with the Risk of Periodontitis: A Dose–response Association Study Based on NHANES 2009–2014
Source: MDPI journal article supplement (doi:10.3390/nu14122466), 2022-06-14
Supplement: s1 [file s1]

**Table S5. Characteristic of categorical variables of model 3**

|                 | Level <sup>a</sup> | Overall <sup>b</sup> | Moderate/Severe periodontitis | No/Mild periodontitis | <i>P</i> <sup>c</sup> |
|-----------------|--------------------|----------------------|-------------------------------|-----------------------|-----------------------|
| No.             |                    | 5530                 | 2765                          | 2765                  |                       |
| PD_dia (%)      | Moderate/Severe    | 2765 (50.0)          | 2765 (100.0)                  | 0 (0.0)               | <0.001                |
|                 | No/Mild            | 2765 (50.0)          | 0 (0.0)                       | 2765 (100.0)          |                       |
| Vitamin_A (%)   | Recommend          | 1359 (24.6)          | 728 (26.3)                    | 631 (22.8)            | 0.003                 |
|                 | Insufficient       | 4171 (75.4)          | 2037 (73.7)                   | 2134 (77.2)           |                       |
| Vitamin_B1 (%)  | Recommend          | 4112 (74.4)          | 2089 (75.6)                   | 2023 (73.2)           | 0.045                 |
|                 | Insufficient       | 1418 (25.6)          | 676 (24.4)                    | 742 (26.8)            |                       |
| Vitamin_B2 (%)  | Recommend          | 4675 (84.5)          | 2370 (85.7)                   | 2305 (83.4)           | 0.017                 |
|                 | Insufficient       | 855 (15.5)           | 395 (14.3)                    | 460 (16.6)            |                       |
| Vitamin_B3 (%)  | Recommend          | 4708 (85.1)          | 2368 (85.6)                   | 2340 (84.6)           | 0.307                 |
|                 | Insufficient       | 822 (14.9)           | 397 (14.4)                    | 425 (15.4)            |                       |
| Vitamin_B6 (%)  | Recommend          | 3914 (70.8)          | 1966 (71.1)                   | 1948 (70.5)           | 0.615                 |
|                 | Insufficient       | 1616 (29.2)          | 799 (28.9)                    | 817 (29.5)            |                       |
| Vitamin_B9 (%)  | Recommend          | 2333 (42.2)          | 1176 (42.5)                   | 1157 (41.8)           | 0.624                 |
|                 | Insufficient       | 3197 (57.8)          | 1589 (57.5)                   | 1608 (58.2)           |                       |
| Vitamin_B12 (%) | Recommend          | 4548 (82.2)          | 2297 (83.1)                   | 2251 (81.4)           | 0.113                 |
|                 | Insufficient       | 982 (17.8)           | 468 (16.9)                    | 514 (18.6)            |                       |
| Vitamin_C (%)   | Recommend          | 2382 (43.1)          | 1161 (42.0)                   | 1221 (44.2)           | 0.109                 |
|                 | Insufficient       | 3148 (56.9)          | 1604 (58.0)                   | 1544 (55.8)           |                       |
| Vitamin_D (%)   | Adequate           | 1221 (22.1)          | 632 (22.9)                    | 589 (21.3)            | 0.173                 |
|                 | Insufficient       | 4309 (77.9)          | 2133 (77.1)                   | 2176 (78.7)           |                       |
| Vitamin_E (%)   | Recommend          | 435 (7.9)            | 243 (8.8)                     | 192 (6.9)             | 0.013                 |
|                 | Insufficient       | 5095 (92.1)          | 2522 (91.2)                   | 2573 (93.1)           |                       |
| Vitamin_K (%)   | Adequate           | 1911 (34.6)          | 986 (35.7)                    | 925 (33.5)            | 0.090                 |
|                 | Insufficient       | 3619 (65.4)          | 1779 (64.3)                   | 1840 (66.5)           |                       |
| Calcium (%)     | Adequate           | 1625 (29.4)          | 844 (30.5)                    | 781 (28.2)            | 0.067                 |
|                 | Insufficient       | 3905 (70.6)          | 1921 (69.5)                   | 1984 (71.8)           |                       |
| Copper (%)      | Recommend          | 4021 (72.7)          | 2043 (73.9)                   | 1978 (71.5)           | 0.053                 |
|                 | Insufficient       | 1509 (27.3)          | 722 (26.1)                    | 787 (28.5)            |                       |
| Iron (%)        | Recommend          | 4178 (75.6)          | 2117 (76.6)                   | 2061 (74.5)           | 0.085                 |
|                 | Insufficient       | 1352 (24.4)          | 648 (23.4)                    | 704 (25.5)            |                       |
| Magnesium (%)   | Recommend          | 1292 (23.4)          | 668 (24.2)                    | 624 (22.6)            | 0.172                 |
|                 | Insufficient       | 4238 (76.6)          | 2097 (75.8)                   | 2141 (77.4)           |                       |

|                |              |             |             |             |       |
|----------------|--------------|-------------|-------------|-------------|-------|
| Phosphorus (%) | Recommend    | 5066 (91.6) | 2551 (92.3) | 2515 (91.0) | 0.090 |
|                | Insufficient | 464 (8.4)   | 214 (7.7)   | 250 (9.0)   |       |
| Potassium (%)  | Adequate     | 272 (4.9)   | 132 (4.8)   | 140 (5.1)   | 0.663 |
|                | Insufficient | 5258 (95.1) | 2633 (95.2) | 2625 (94.9) |       |
| Selenium (%)   | Recommend    | 5072 (91.7) | 2539 (91.8) | 2533 (91.6) | 0.807 |
|                | Insufficient | 458 (8.3)   | 226 (8.2)   | 232 (8.4)   |       |
| Sodium (%)     | Adequate     | 5357 (96.9) | 2691 (97.3) | 2666 (96.4) | 0.064 |
|                | Insufficient | 173 (3.1)   | 74 (2.7)    | 99 (3.6)    |       |
| Zinc (%)       | Recommend    | 3258 (58.9) | 1654 (59.8) | 1604 (58.0) | 0.180 |
|                | Insufficient | 2272 (41.1) | 1111 (40.2) | 1161 (42.0) |       |

---

a: Variables that provide Recommended Dietary Allowance(RDA) are divided into "Recommend" and "Insufficient" groups according to whether RDA is reached. Variables that provide Adequate Intake(AI) are divided into "Adequate" and "Insufficient" groups according to whether AI is reached;

b: Number of people with adequate and insufficient nutrient intake (percentage);

c: Chi square test was used for all categorical variables.
