# Supplementary material for: Abnormal Micronutrient Intake Is Associated with the Risk of Periodontitis: A Dose–response Association Study Based on NHANES 2009–2014
Source: MDPI journal article supplement (doi:10.3390/nu14122466), 2022-06-14
Supplement: s1 [file s1]

**Table S1.** The classification criteria for inadequate intake

| <i>Recommended Dietary Allowance</i> |              |            |
|--------------------------------------|--------------|------------|
| Nutrition                            | Measurement: | Deficiency |
| Vitamin_A                            | µg RAEa/day  |            |
| Gender                               | Age          |            |
| Males                                | All          | <900       |
| Females                              | All          | <700       |
| Vitamin_B1 (Thiamin)                 | mg/day       |            |
| Gender                               | Age          |            |
| Males                                | All          | <1.2       |
| Females                              | All          | <1.1       |
| Vitamin_B2 (Riboflavin)              | mg/day       |            |
| Gender                               | Age          |            |
| Males                                | All          | <1.3       |
| Females                              | All          | <1.1       |
| Vitamin_B3 (Niacin)                  | mg/day       |            |
| Gender                               | Age          |            |
| Males                                | All          | <16        |
| Females                              | All          | <14        |
| Vitamin_B6                           | mg/day       |            |
| Gender                               | Age          |            |
| Males                                | ≤50          | <1.3       |
|                                      | >50          | <1.7       |
| Females                              | ≤50          | <1.3       |
|                                      | >50          | <1.5       |
| Vitamin_B9 (Total_folate)            | µg/day       |            |
| Gender                               | Age          |            |
| All                                  | All          | <400       |
| Vitamin_B12                          | µg/day       |            |
| Gender                               | Age          |            |
| All                                  | All          | <2.4       |
| Vitamin_C                            | mg/day       |            |
| Gender                               | Age          |            |
| Males                                | All          | <90        |
| Females                              | All          | <75        |

|                        |              |            |
|------------------------|--------------|------------|
| Vitamin_E              | mg/day       |            |
| Gender                 | Age          |            |
| All                    | All          | <15        |
| Copper                 | mg/day       |            |
| Gender                 | Age          |            |
| All                    | All          | <0.9       |
| Iron                   | mg/day       |            |
| Gender                 | Age          |            |
| Males                  | ≤50          | <8         |
|                        | >50          | <8         |
| Females                | ≤50          | <18        |
|                        | >50          | <8         |
| Magnesium              | mg/day       |            |
| Gender                 | Age          |            |
| Males                  | All          | <420       |
| Females                | All          | <320       |
| Phosphorus             | mg/day       |            |
| Gender                 | Age          |            |
| All                    | All          | <700       |
| Selenium               | µg/day       |            |
| Gender                 | Age          |            |
| All                    | All          | <55        |
| Zinc                   | mg/day       |            |
| Gender                 | Age          |            |
| Males                  | All          | <11        |
| Females                | All          | <8         |
| Carbohydrate           | g/day        |            |
| Gender                 | Age          |            |
| All                    | All          | <130       |
| Protein                | g/day        |            |
| Gender                 | Age          |            |
| Males                  | All          | <56        |
| Females                | All          | <46        |
| <i>Adequate Intake</i> |              |            |
| Nutrition              | Measurement: | Deficiency |

|               |        |       |
|---------------|--------|-------|
| Vitamin_D     | µg/day |       |
| Gender        | Age    |       |
| All           | ≤50    | <5    |
| All           | 50-70  | <10   |
| All           | >70    | <15   |
| Vitamin_K     | µg/day |       |
| Gender        | Age    |       |
| Males         | All    | <120  |
| Females       | All    | <90   |
| Calcium       | µg/day |       |
| Gender        | Age    |       |
| All           | ≤50    | <1000 |
| All           | >50    | <1200 |
| Potassium     | mg/day |       |
| Gender        | Age    |       |
| All           | All    | <4700 |
| Sodium        | mg/day |       |
| Gender        | Age    |       |
| All           | ≤50    | <1500 |
| All           | 50-70  | <1300 |
| All           | >70    | <1200 |
| Dietary_fiber | g/day  |       |
| Gender        | Age    |       |
| Males         | ≤50    | <25   |
|               | >50    | <38   |
| Females       | ≤50    | <21   |
|               | >50    | <30   |
| Total_choline | mg/day |       |
| Gender        | Age    |       |
| Males         | All    | <550  |
| Females       | All    | <425  |
