# Supplementary material for: Abnormal Micronutrient Intake Is Associated with the Risk of Periodontitis: A Dose–response Association Study Based on NHANES 2009–2014
Source: MDPI journal article supplement (doi:10.3390/nu14122466), 2022-06-14
Supplement: s1 [file s1]

# **Abnormal micronutrient intake is associated with the risk of periodontitis: A dose-response association study based on NHANES**

**Short title:** Micronutrient Intake and Periodontitis

Weiqi Li<sup>1</sup>, Qianhui Shang<sup>1,2</sup>, Dan Yang<sup>1</sup>, Jiakuan Peng<sup>1,2</sup>, Hang Zhao<sup>\*1</sup>, Hao Xu<sup>\*1</sup>, Qianming Chen<sup>3</sup>

## **S1 Appendix: Details for eligibility criteria and covariates classification**

### **1.1. eligibility criteria**

Inclusion Criteria:

- 1) Participants with complete periodontal examination data;
- 2) Participants with complete dietary nutritional intake data;

Exclusion Criteria:

- 1) Participants with edentulous jaws;
- 2) Participants with only one dental examination site (not identifiable as periodontitis);
- 3) Participants who were breastfeeding at the time of the survey;
- 4) Participants who were pregnant at the time of the survey.

### **1.2. Covariates classification**

Education is divided into not graduated from high school, High school graduation, Not graduated from college, and college graduation[1, 2]. According to the reference[3], income is categorized into three different levels based on the household income to poverty ratio (IPR) of  $\leq 1.30$ , 1.31-3.50 and  $> 3.50$ . physical activity, Participants were determined to be physically active on a

regular basis based on whether they had 150 minutes of moderate to high physical activity per week[4]. Never smokers (<100 cigarettes in their lifetime and currently do not smoke), former smokers ( $\geq 100$  cigarettes in their lifetime and currently do not smoke), and active smokers ( $\geq 100$  cigarettes in their lifetime and currently smoke). A participant is considered as a drinker if he or she consumes  $\geq 12$  alcoholic beverages in a year or has had  $\geq 12$  drinks in his or her lifetime[5]. We use the measured Body Mass Index (BMI) as a judgment of obesity. Self-reported diabetes or glycated hemoglobin was  $> 6.5\%$  was defined as a diabetic patient (<https://www.ncbi.nlm.nih.gov/pmc/articles/PMC2797388/>). Hypertensive patients were based on SBP  $\geq 140$  mm Hg and/or DBP  $\geq 90$  mm Hg and participants taking antihypertensive medication. According to the criteria provided by the US National Library of Medicine[6], Total Cholesterol Level  $\geq 240$ mg/dL or Low-density lipoprotein (LDL) Cholesterol Level  $\geq 130$  mg/dL are hyperlipidemic patients (<https://medlineplus.gov/lab-tests/>).

1. Wright, D.M., et al., *Association between diet and periodontitis: a cross-sectional study of 10,000 NHANES participants*. Am J Clin Nutr, 2020. **112**(6): p. 1485-1491.
2. Bidinotto, A.B., et al., *Investigation of direct and indirect association of ultra-processed food intake and periodontitis*. J Periodontol, 2021.
3. Lan, T., et al., *BMI modifies the association between dietary intake and serum levels of PCBs*. Environ Int, 2021. **156**: p. 106626.
4. Chen, F., et al., *Association Among Dietary Supplement Use, Nutrient Intake, and Mortality Among U.S. Adults: A Cohort Study*. Ann Intern Med, 2019. **170**(9): p. 604-613.
5. Arora, M., et al., *Association of environmental cadmium exposure with periodontal disease in U.S. adults*. Environ Health Perspect, 2009. **117**(5): p. 739-44.
6. Brook, R.D. and S. Rajagopalan, *2017 ACC/AHA/AAPA/ABC/ACPM/AGS/APhA/ASH/ASPC/NMA/PCNA Guideline for the Prevention, Detection, Evaluation, and Management of High Blood Pressure in Adults. A report of the American College of Cardiology/American Heart Association Task Force on Clinical Practice Guidelines*. J Am Soc Hypertens, 2018. **12**(3): p. 238.
