# Supplementary material for: Abnormal Micronutrient Intake Is Associated with the Risk of Periodontitis: A Dose–response Association Study Based on NHANES 2009–2014
Source: MDPI journal article supplement (doi:10.3390/nu14122466), 2022-06-14
Supplement: s1 [file s1]

**Table S2. Details of adjusted covariates for each model**

| Model  | Logistic                                                                                                                                             | PSM                                                                                                                                      |
|--------|------------------------------------------------------------------------------------------------------------------------------------------------------|------------------------------------------------------------------------------------------------------------------------------------------|
| Model0 | glm(PD~ Nutrition)                                                                                                                                   | NA                                                                                                                                       |
| Model1 | glm(PD~ Nutrition+ Age+ Gender+Education level+ income+ physical activity+ smoking status+ alcohol use+ BMI+ diabetes+ hypertension+ hyperlipidemia) | NA                                                                                                                                       |
| Model2 | glm(PD~ Nutrition+ physical activity+ smoking status+ alcohol use)                                                                                   | Psm(PD~ Age+ Gender+Education level+ income+ BMI+ diabetes + hypertension+ hyperlipidemia)                                               |
| Model3 | glm(PD~ Nutrition)                                                                                                                                   | Psm(PD~ Age+Gender+Education level+ income+ physical activity+ smoking status+ alcohol use+ BMI+ diabetes+ hypertension+ hyperlipidemia) |
