# Supplementary material for: Abnormal Micronutrient Intake Is Associated with the Risk of Periodontitis: A Dose–response Association Study Based on NHANES 2009–2014
Source: MDPI journal article supplement (doi:10.3390/nu14122466), 2022-06-14
Supplement: s1 [file s1]

**Table S3. Details for the micronutrient's intake unit's adjustment**

| Nutrition   | unadjusted | adjusted |
|-------------|------------|----------|
| Vitamins    |            |          |
| Vitamin_A   | 1µg        | 1mg      |
| Vitamin_B1  | 1mg        | 1mg      |
| Vitamin_B2  | 1mg        | 1mg      |
| Vitamin_B3  | 1mg        | 100mg    |
| Vitamin_B6  | 1mg        | 1mg      |
| Vitamin_B9  | 1µg        | 100µg    |
| Vitamin_B12 | 1µg        | 10µg     |
| Vitamin_C   | 1mg        | 100mg    |
| Vitamin_D   | 1µg        | 10µg     |
| Vitamin_E   | 1mg        | 1mg      |
| Vitamin_K   | 1µg        | 100µg    |
| Minerals    |            |          |
| Calcium     | 1mg        | 100mg    |
| Copper      | 1mg        | 1mg      |
| Iron        | 1mg        | 10mg     |
| Magnesium   | 1mg        | 100mg    |
| Phosphorus  | 1mg        | 1g       |
| Potassium   | 1mg        | 1g       |
| Selenium    | 1µg        | 100µg    |
| Sodium      | 1mg        | 1g       |
| Zinc        | 1mg        | 10mg     |
